# Age- and Sex-Based Hematological and Biochemical Parameters for *Macaca fascicularis*

Liang Xie<sup>1,2,3,9</sup>, Fan Xu<sup>1,2,9</sup>, Shigang Liu<sup>4,9</sup>, Yongjia Ji<sup>1,2,3,9</sup>, Qiming Zhou<sup>1,2,3</sup>, Qingyuan Wu<sup>1,2,3</sup>, Wei Gong<sup>1,2</sup>, Ke Cheng<sup>1,2,3</sup>, Juan Li<sup>1,2,3</sup>, Leilei Li<sup>5</sup>, Liang Fang<sup>1,2</sup>, Linke Zhou<sup>1,2,3</sup>, Peng Xie<sup>1,2,3\*</sup>

**1** Institute of Neuroscience, Chongqing Medical University, Chongqing, China, **2** Chongqing Key Laboratory of Neurobiology, Chongqing, China, **3** Department of Neurology, The First Affiliated Hospital of Chongqing Medical University, Chongqing, China, **4** Suzhou Xishan Zhongke Laboratory Animal Co., Ltd., Suzhou, China, **5** Chinese Center for Disease Control and Prevention, Beijing, China

## Abstract

**Background:** The cynomolgus monkey (*Macaca fascicularis*) has been increasingly used in biomedical research, making knowledge of its blood-based parameters essential to support the selection of healthy subjects and its use in preclinical research. As age and sex affect these blood-based parameters, it is important to establish baseline indices for these parameters on an age and sex basis and determine the effects of age and sex on these indices.

**Methods:** A total of 917 cynomolgus monkeys (374 males and 543 females) were selected and segregated by age (five groups) and sex. A total of 30 hematological and 22 biochemical parameters were measured, and the effects of age and sex were analyzed.

**Results:** Baseline indices for hematological and biochemical parameters were separately established by age and sex. Significant effects by age, sex, and age-sex interaction were observed in a number of blood parameters. In the 49–60 months and 61–72 months age groups, red blood cell count, hemoglobin, and hematocrit showed significantly lower values ( $P < 0.01$ ) in females than males. Serum alkaline phosphatase varied with age in both sexes ( $P < 0.01$ ) and was significantly higher in females than males ( $P < 0.05$ ) in the groups aged 13–24 months and 25–36 months; however, in the three groups aged over 25–36 months, serum alkaline phosphatase was significantly lower in females than males ( $P < 0.01$ ). Creatinine concentration increased with age ( $P < 0.01$ ) in all age groups; specifically in the groups aged 49–60 months and 61–72 months, creatinine was significantly higher ( $P < 0.01$ ) in males than females. Total protein and globulin both increased with age ( $P < 0.01$ ).

**Conclusion:** The baseline values of hematological and biochemical parameters reported herein establish reference indices of blood-based parameters in the cynomolgus monkey by age and sex, thereby aiding researchers in selecting healthy subjects and evaluating preclinical studies using this species.

**Citation:** Xie L, Xu F, Liu S, Ji Y, Zhou Q, et al. (2013) Age- and Sex-Based Hematological and Biochemical Parameters for *Macaca fascicularis*. PLoS ONE 8(6): e64892. doi:10.1371/journal.pone.0064892

**Editor:** Qianjun Li, University of Alabama at Birmingham, United States of America

**Received:** January 13, 2013; **Accepted:** April 19, 2013; **Published:** June 10, 2013

**Copyright:** © 2013 Xie et al. This is an open-access article distributed under the terms of the Creative Commons Attribution License, which permits unrestricted use, distribution, and reproduction in any medium, provided the original author and source are credited.

**Funding:** This work was supported by the National Basic Research Program of China (973 Program; Grant No. 2009CB918300) and National Natural Science Foundation of China (Grant No. 31271189). The funders had no role in study design, data collection and analysis, decision to publish, or preparation of the manuscript.

**Competing Interests:** The Suzhou Xishan Zhongke Laboratory Animal Company, Ltd. (hereinafter “the Suzhou Company”) is a private (non-governmental) independent Chinese limited liability corporate entity with three operating subsidiaries: the Production Center for Laboratory Animals, the National Resource Center for Nonhuman Primates, and the Suzhou Drug Safety Evaluation & Research Center (see <http://www.szszk.com/jigou.do>). One co-author, Shigang Liu, is currently employed by the Suzhou Company through its Production Center for Laboratory Animals subsidiary, but has no consulting relationship with nor any ownership interest in the Suzhou Company or its subsidiaries. This does not alter the authors’ adherence to all the PLOS ONE policies on sharing data and materials. All other co-authors have no employment, consulting, or ownership interests in the Suzhou Company or its subsidiaries. All co-authors do not share intellectual property/patent rights, nor any joint interests in products in development or marketed products with the Suzhou Company or its subsidiaries. All co-authors declare no other competing interests related to this study.

\* E-mail: xiepeng@cqmu.edu.cn

9 These authors contributed equally to this work.

## Introduction

The cynomolgus monkey (*Macaca fascicularis*), an Old World monkey, has been increasingly used in biomedical research. Old World monkeys, New World monkeys, apes, and humans (collectively termed simians) are grouped under the primate infraorder *Anthropoidea* on account of their larger and more complicated brains relative to those of other primates. The

cynomolgus monkey appears to originate from tropical insular Southeast Asia. Its natural range extends southward to the Malay Peninsula, Sumatra, Borneo, Java and the Lesser Sunda Islands (including Bali and Timor), the Philippines, and westward to southern Burma, southern Bangladesh and India [1]. The species is most commonly observed at low elevations, where it prefers seashore, swamp, and mangrove forests and river banks. The typical life span of the cynomolgus monkey ranges from 25–30

years [2]. Sexual maturity is reached at four years of age for the female and six years of age for the male [3].

Cynomolgus monkeys have been increasingly used in research circles, as they are more anatomically and physiologically homologous to humans as compared to other animal models (e.g., rats, pigs) and share many other characteristics with humans. First, cynomolgus monkeys are sexually dimorphic with respect to size (males: 412–648 mm [excluding tail], 4.7–8.3 kg; females: 385–503 mm [excluding tail], 2.5 and 5.7 kg) [4]. Second, cynomolgus monkeys are omnivorous and consume a variety of foods (e.g., fruits, crabs, flowers, insects, leaves, fungi, grasses, and clay), reflecting the diverse habitats they occupy. Third, similar to human females, female cynomolgus monkeys exhibit menstrual cycles as the uterine lining periodically sloughs on a monthly basis (mean length: 28–32 days) and experience reproductive functional loss with age (e.g., progression from normal menstruation to irregular cycles to cycle cessation and infertility) [5]. Fourth, cynomolgus monkeys are susceptible to age-related pathologies commonly observed in humans, such as decreased cardiovascular function, functional cognitive decline and biochemical changes similar to those found in Alzheimer's disease [6,7], bone loss [8], knee osteoarthritis [9], obesity, and diabetes [10] (and complications therefrom, including diabetic neuropathy and retinopathy). Fifth, cynomolgus monkeys are natural hosts to a wide variety of viral agents (e.g., Herpes B [11], simian retroviruses [12], ebola-related virus, hepatitis A virus [13], simian parvovirus [14], measles [15], and monkeypox [16]) with analogs in humans.

As a result of the increased use of the cynomolgus monkey, it has become imperative to assess the hematological and biochemical parameters of this monkey species in order to support the selection of healthy subjects, as well as to build reference indices for their use in preclinical research (e.g., transplantation, toxicology). In order to build an integrated, high-quality foundation for future cynomolgus monkey-based research, one of the first and most important investigations should be to assess and establish comprehensive and accurate reference indices of hematological and biochemical parameters for the species.

Although there have been some published studies reporting hematological and biochemical values of cynomolgus monkeys, the sample size of most of these studies has been relatively small [17,18]. Furthermore, some prior studies have reported the values combined for all age groups [19]. In addition, some valuable indices have never been reported before [20,21] (e.g., immature reticulocyte fraction, low fluorescence reticulocyte percentage). To our knowledge, the values of hematological and serum biochemical parameters in non-human primates may be influenced by age [22,23], sex [24,25], body weight [26], species [27,28], anaesthetics [29–31], breeding background [18], gravidity [32,33], and disease [34,35]; among these factors, age and sex are important for comparatively evaluating experimental data. Therefore, the aim of

**Table 1.** Sample sizes by age and sex.

| Age (months) | Males and females (n) | Males (n) | Females (n) |
|--------------|-----------------------|-----------|-------------|
| 13–24        | 324                   | 162       | 162         |
| 25–36        | 299                   | 121       | 178         |
| 37–48        | 88                    | 16        | 72          |
| 49–60        | 115                   | 31        | 84          |
| 61–72        | 91                    | 44        | 47          |
| Total        | 917                   | 374       | 543         |

doi:10.1371/journal.pone.0064892.t001

**Table 2.** List of hematological and biochemical parameters\*.

| Parameter                                   | Abbreviation | Unit              |
|---------------------------------------------|--------------|-------------------|
| Red blood cell                              | RBC          | $10^{12}/l$       |
| Hemoglobin                                  | HGB          | g/l               |
| Hematocrit                                  | HCT          | %                 |
| Mean corpuscular volume                     | MCV          | fl                |
| Mean corpuscular hemoglobin                 | MCH          | pg                |
| Mean corpuscular hemoglobin concentration   | MCHC         | g/l               |
| Red blood cell volume distribution width-SD | RDW-SD       | –                 |
| Red blood cell volume distribution width-CV | RDW-CV       | %                 |
| Reticulocyte                                | RET          | $10^9/l$          |
| Reticulocyte percentage                     | RET%         | %                 |
| High fluorescence reticulocyte percentage   | HFR          | %                 |
| Median fluorescence reticulocyte percentage | MFR          | %                 |
| Low fluorescence reticulocyte percentage    | LFR          | %                 |
| Immature reticulocyte fraction              | IRF          | %                 |
| White blood cell                            | WBC          | $10^9/l$          |
| Neutrophil                                  | NEUT         | $10^9/l$          |
| Neutrophil percentage                       | NEUT%        | %                 |
| Basophil                                    | BASO         | $10^9/l$          |
| Basophil percentage                         | BASO%        | %                 |
| Eosinophil                                  | EO           | $10^9/l$          |
| Eosinophil percentage                       | EO%          | %                 |
| Lymphocyte                                  | LYMPH        | $10^9/l$          |
| Lymphocyte percentage                       | LYMPH%       | %                 |
| Monocyte                                    | MONO         | $10^9/l$          |
| Monocyte percentage                         | MONO%        | %                 |
| Platelet                                    | PLT          | $10^9/l$          |
| Mean platelet volume                        | MPV          | fl                |
| Plate volume distribution width             | PDW          | %                 |
| Platelet large cell ratio                   | P-LCR        | %                 |
| Plateletcrit                                | PCT          | %                 |
| Total bilirubin                             | TBIL         | $\mu\text{mol}/l$ |
| Total protein                               | TP           | g/l               |
| Albumin                                     | ALB          | g/l               |
| Globulin                                    | GLOB         | g/l               |
| Albumin/globulin ratio                      | A/G          | –                 |
| Alanine aminotransferase                    | ALT          | IU/L              |
| Aspartate aminotransferase                  | AST          | IU/L              |
| Alkaline phosphatase                        | ALP          | IU/L              |
| Gamma glutamyltransferase                   | GGT          | IU/L              |
| Lactate dehydrogenase                       | LDH          | IU/L              |
| Creatine kinase                             | CK           | IU/L              |
| Blood urea nitrogen                         | BUN          | mmol/l            |
| Creatinine                                  | CREA         | $\mu\text{mol}/l$ |
| Glucose                                     | GLU          | mmol/l            |
| Triglyceride                                | TG           | mmol/l            |
| Total cholesterol                           | TCHOL        | mmol/l            |
| Potassium                                   | K            | mmol/l            |
| Sodium                                      | Na           | mmol/l            |
| Chloride                                    | Cl           | mmol/l            |

**Table 2.** Cont.

| Parameter  | Abbreviation | Unit   |
|------------|--------------|--------|
| Calcium    | Ca           | mmol/l |
| Phosphorus | P            | mmol/l |
| Magnesium  | Mg           | mmol/l |

\*The first 30 items are hematological parameters; the latter 22 items are biochemical parameters.

doi:10.1371/journal.pone.0064892.t002

this study is to establish comprehensive and accurate reference indices of 52 hematological and biochemical parameters by age and sex based on 917 cynomolgus monkeys and determine the effects of age and sex on these blood values, thereby providing researchers with improved assessment criteria in selecting healthy subjects and evaluating preclinical studies using this macaque species.

## Materials and Methods

### Subjects and Ethical Statement

The study population was composed of 917 cynomolgus monkeys (374 males and 543 females; age: 13–72 months) obtained from Xishan Zhongke Laboratory Animals Co. Ltd. (Suzhou, China) (Table 1). Animals were kept at the Suzhou Xishan Zhongke Laboratory Animal Co., Ltd., which is accredited by the Association for the Assessment and Accreditation of Laboratory Animal Care International (AAALAC).

All subjects were housed in same-sex social groups that were formed when the monkeys were six months of age and were stable thereafter. The groups were housed in indoor pens measuring 8 m × 3 m × 3 m (L×W×H), given water *ad libitum*, and fed daily with fresh fruits, vegetables, and compound high-nutrition monkey food. Indoor pens were maintained at a temperature higher than 18°C and relative humidity of 40%–70%. The living environment and animal care procedures were detailed in a previous report [36], which were in accordance with Chinese regulatory requirements and the Association for the Assessment and Accreditation of

**Table 3.** Summary of age and sex effects on hematological parameters.

| Parameter | Age                          | Sex                          | Interaction                  |
|-----------|------------------------------|------------------------------|------------------------------|
| RBC       | F(4,907) = 5.23, $P < 0.01$  | F(1,907) = 35.26, $P < 0.01$ | F(4,907) = 9.15, $P < 0.01$  |
| HGB       | F(4,907) = 3.16, $P < 0.05$  | F(1,907) = 32.18, $P < 0.01$ | F(4,907) = 9.28, $P < 0.01$  |
| HCT       | F(4,907) = 4.42, $P < 0.05$  | F(1,907) = 20.34, $P < 0.01$ | F(4,907) = 11.34, $P < 0.01$ |
| MCV       | F(4,907) = 9.50, $P < 0.01$  | F(1,907) = 10.24, $P < 0.05$ | F(4,907) = 2.08, NS          |
| MCH       | F(4,907) = 2.31, NS          | F(1,907) = 1.04, NS          | F(4,907) = 1.40, NS          |
| MCHC      | F(4,907) = 9.35, $P < 0.01$  | F(1,907) = 14.59, $P < 0.01$ | F(4,907) = 0.23, NS          |
| RDW-SD    | F(4,907) = 3.26, $P < 0.05$  | F(1,907) = 0.01, NS          | F(4,907) = 1.62, NS          |
| RDW-CV    | F(4,907) = 2.10, NS          | F(1,907) = 3.07, NS          | F(4,907) = 0.66, NS          |
| RET       | F(4,907) = 1.45, NS          | F(1,907) = 18.76, $P < 0.01$ | F(4,907) = 3.14, $P < 0.05$  |
| RET%      | F(4,907) = 2.72, $P < 0.05$  | F(1,907) = 25.69, $P < 0.01$ | F(4,907) = 3.97, $P < 0.01$  |
| HFR       | F(4,907) = 2.77, $P < 0.05$  | F(1,907) = 9.10, $P < 0.05$  | F(4,907) = 2.43, $P < 0.05$  |
| MFR       | F(4,907) = 3.75, $P < 0.05$  | F(1,907) = 13.78, $P < 0.01$ | F(4,907) = 1.10, NS          |
| LFR       | F(4,907) = 1.04, NS          | F(1,907) = 1.46, NS          | F(4,907) = 1.57, NS          |
| IRF       | F(4,907) = 1.04, NS          | F(1,907) = 1.46, NS          | F(4,907) = 1.57, NS          |
| WBC       | F(4,907) = 1.05, NS          | F(1,907) = 6.10, $P < 0.05$  | F(4,907) = 2.56, $P < 0.05$  |
| NEUT      | F(4,907) = 13.66, $P < 0.01$ | F(1,907) = 39.59, $P < 0.01$ | F(4,907) = 1.36, NS          |
| NEUT%     | F(4,907) = 22.29, $P < 0.01$ | F(1,907) = 47.89, $P < 0.01$ | F(4,907) = 3.66, $P < 0.01$  |
| BASO      | F(4,907) = 11.92, $P < 0.01$ | F(1,907) = 3.73, NS          | F(4,907) = 2.93, $P < 0.05$  |
| BASO%     | F(4,907) = 14.34, $P < 0.01$ | F(1,907) = 0.53, NS          | F(4,907) = 1.28, NS          |
| EO        | F(4,907) = 9.35, $P < 0.01$  | F(1,907) = 1.05, NS          | F(4,907) = 1.28, NS          |
| EO%       | F(4,907) = 8.26, $P < 0.01$  | F(1,907) = 0.01, NS          | F(4,907) = 0.30, NS          |
| LYMPH     | F(4,907) = 15.16, $P < 0.01$ | F(1,907) = 15.94, $P < 0.01$ | F(4,907) = 5.49, $P < 0.01$  |
| LYMPH%    | F(4,907) = 23.66, $P < 0.01$ | F(1,907) = 45.85, $P < 0.01$ | F(4,907) = 3.66, $P < 0.01$  |
| MONO      | F(4,907) = 2.43, $P < 0.05$  | F(1,907) = 1.81, NS          | F(4,907) = 4.01, $P < 0.01$  |
| MONO%     | F(4,907) = 2.08, NS          | F(1,907) = 11.07, $P < 0.01$ | F(4,907) = 1.46, NS          |
| PLT       | F(4,907) = 0.16, NS          | F(1,907) = 0.02, NS          | F(4,907) = 2.05, NS          |
| MPV       | F(4,907) = 3.18, $P < 0.05$  | F(1,907) = 3.58, NS          | F(4,907) = 2.15, NS          |
| PDW       | F(4,907) = 2.64, $P < 0.05$  | F(1,907) = 1.01, NS          | F(4,907) = 1.03, NS          |
| P-LCR     | F(4,907) = 4.11, $P < 0.01$  | F(1,907) = 6.44, $P < 0.05$  | F(4,907) = 2.58, $P < 0.05$  |
| PCT       | F(4,907) = 0.41, NS          | F(1,907) = 1.12, NS          | F(4,907) = 2.28, NS          |

NS, not significant.

doi:10.1371/journal.pone.0064892.t003

**Table 4.** Summary of age and sex effects on biochemical parameters.

| Parameter | Age                           | Sex                          | Interaction                  |
|-----------|-------------------------------|------------------------------|------------------------------|
| BILT      | F(4,907) = 2.15, NS           | F(1,907) = 1.89, NS          | F(4,907) = 0.25, NS          |
| TP        | F(4,907) = 23.89, $P < 0.01$  | F(1,907) = 0.02, NS          | F(4,907) = 2.31, NS          |
| ALB       | F(4,907) = 3.01, $P < 0.05$   | F(1,907) = 6.68, $P < 0.01$  | F(4,907) = 4.64, $P < 0.01$  |
| GLOB      | F(4,907) = 71.87, $P < 0.01$  | F(1,907) = 7.89, $P < 0.01$  | F(4,907) = 3.04, $P < 0.05$  |
| A/G       | F(4,907) = 44.02, $P < 0.01$  | F(1,907) = 11.24, $P < 0.01$ | F(4,907) = 5.24, $P < 0.01$  |
| ALT       | F(4,907) = 16.62, $P < 0.01$  | F(1,907) = 0.00, NS          | F(4,907) = 3.49, $P < 0.01$  |
| AST       | F(4,907) = 45.88, $P < 0.01$  | F(1,907) = 3.09, NS          | F(4,907) = 2.36, NS          |
| ALP       | F(4,907) = 112.80, $P < 0.01$ | F(1,907) = 57.01, $P < 0.01$ | F(4,907) = 26.50, $P < 0.01$ |
| GGT       | F(4,907) = 17.90, $P < 0.01$  | F(1,907) = 9.62, $P < 0.01$  | F(4,907) = 2.83, $P < 0.05$  |
| LDH       | F(4,907) = 75.66, $P < 0.01$  | F(1,907) = 10.29, $P < 0.01$ | F(4,907) = 2.68, $P < 0.05$  |
| CK        | F(4,907) = 3.34, $P < 0.01$   | F(1,907) = 0.35, NS          | F(4,907) = 0.07, NS          |
| BUN       | F(4,907) = 49.73, $P < 0.01$  | F(1,907) = 0.14, NS          | F(4,907) = 1.32, NS          |
| CREA      | F(4,907) = 289.64, $P < 0.01$ | F(1,907) = 43.66, $P < 0.01$ | F(4,907) = 21.33, $P < 0.01$ |
| GLU       | F(4,907) = 14.46, $P < 0.01$  | F(1,907) = 0.39, NS          | F(4,907) = 2.26, NS          |
| TG        | F(4,907) = 4.25, $P < 0.01$   | F(1,907) = 0.03, NS          | F(4,907) = 1.43, NS          |
| TCHOL     | F(4,907) = 2.89, $P < 0.05$   | F(1,907) = 3.33, NS          | F(4,907) = 2.55, $P < 0.05$  |
| K         | F(4,907) = 12.61, $P < 0.01$  | F(1,907) = 0.09, NS          | F(4,907) = 5.54, $P < 0.01$  |
| Na        | F(4,907) = 29.18, $P < 0.01$  | F(1,907) = 0.04, NS          | F(4,907) = 6.91, $P < 0.01$  |
| Cl        | F(4,907) = 0.86, NS           | F(1,907) = 23.76, $P < 0.01$ | F(4,907) = 2.22, NS          |
| Ca        | F(4,907) = 9.12, $P < 0.01$   | F(1,907) = 5.02, $P < 0.05$  | F(4,907) = 8.68, $P < 0.01$  |
| P         | F(4,907) = 5.21, $P < 0.01$   | F(1,907) = 23.46, $P < 0.01$ | F(4,907) = 2.51, $P < 0.05$  |
| Mg        | F(4,907) = 14.85, $P < 0.01$  | F(1,907) = 0.82, NS          | F(4,907) = 4.10, $P < 0.01$  |

NS, not significant.

doi:10.1371/journal.pone.0064892.t004

Laboratory Animal Care International (AAALAC) guidelines. These monkeys were determined to be healthy by history and veterinary examination, and they were free of tuberculosis and Herpes B virus. All procedures involving macaques were approved by the Animal Care and Use Committee of Chongqing Medical University (Approval No: 20100031) and were in compliance with the Guide for the Care and Use of Laboratory Animals [37]. Blood samples were collected during biannual routine health check-ups. No animals were sacrificed in the study.

### Blood Sample Collection and Preparation

After overnight fasting (14–16 h), conscious monkeys were restrained humanely by experienced animal care technicians, and 4-ml blood samples were drawn from cephalic veins through 22-gauge needles. Then, 2-ml aliquots from all blood samples were individually transferred into ethylene diamine tetraacetic acid-potassium (EDTA-K2) tubes for hematological analysis; the remaining 2-ml aliquots were stored in plastic tubes without anti-coagulants for biochemical analysis. The latter aliquots were allowed to clot at room temperature for 30–60 min, and the serum was separated by centrifugation at 1600 g for 15 min. The serum was stored in polypropylene tubes at  $-20^{\circ}\text{C}$  until later analysis.

### Hematological and Biochemical Analysis

Hematological analysis was performed using a Sysmex XT-2000iv automated hematology analyzer (Sysmex Corporation, Kobe, Japan). Biochemical analysis was carried out using an Architect c8000 analyzer (Abbott Laboratories, Abbott Park,

USA). Hematological and biochemical parameters are listed in Table 2.

### Statistical Analysis

All data, including hematological and biochemical references, were presented as means  $\pm$  standard errors (Tables S1–S10). The two-way unbalanced analysis of variance (ANOVA) was used to examine the effect of sex, age, and sex-age interaction (Tables 3, 4). Moreover, the post hoc test (by one-way ANOVA) was executed to distinguish the differences in the five age groups within the same sex. Finally, a Student's *t*-test was applied to detect significant differences between male and female subjects in the same age groups. The significance level ( $\alpha$ ) was set to 0.05. All data processing, data management, and statistical analysis were performed using Stata (College station, Texas, USA.12.0).

### Results

#### Reference Ranges of Hematological and Biochemical Values

Reference values and ranges of hematological and biochemical values by sex and age are reported in Tables S1–S10.

#### Effects of Age and Sex on Hematological Values

The results of analyzing age, sex and sex-age interaction on hematological values are presented in Table 3. Significant effects by age were shown for RBC, HGB, HCT, MCV, MCHC, RDW-SD, RET%, HFR, MFR, NEUT, NEUT%, BASO, BASO%, EO, EO%, LYMPH, LYMPH%, MONO, MPV, PDW, and P-

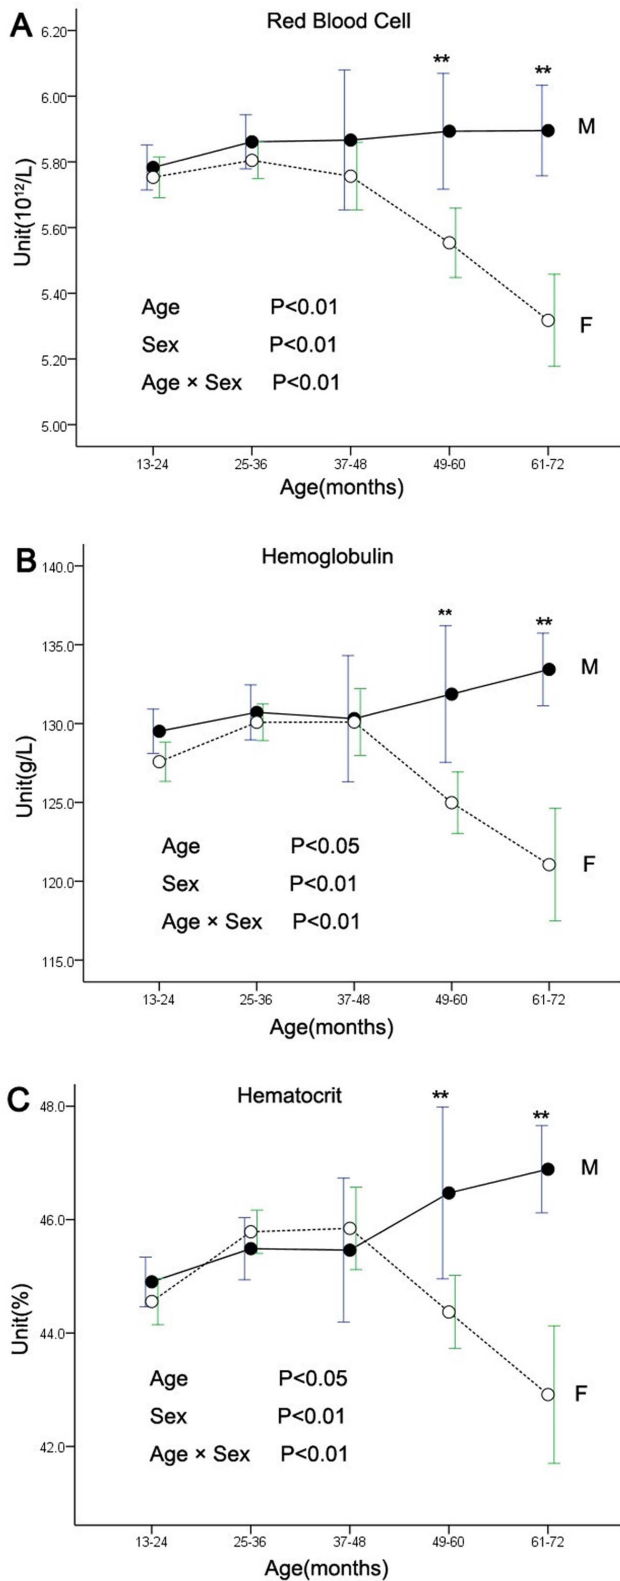

**Figure 1. Changes of red blood cells (A), hemoglobin (B), hematocrit (C) in males and females with age.** Data are presented as means  $\pm$  SDs at each point. Significant difference between indicated age groups as revealed by *post hoc* analyses (\* $P<0.05$ , \*\* $P<0.01$ ). doi:10.1371/journal.pone.0064892.g001

LCR. Significant effects by sex were observed for RBC, HGB, HCT, MCV, MCHC, RET, RET%, HFR, MFR, WBC, NEUT, NEUT%, LYMPH, LYMPH%, MONO%, and P-LCR. Significant effects by age-sex interaction were found for RBC, HGB, HCT, RET, RET%, HFR, WBC, NEUT%, BASO, LYMPH, LYMPH%, MONO, and P-LCR. For the 49–60 months and 61–72 months age groups, RBC, HGB, and HCT showed significantly lower values ( $P<0.01$ ) in females than males (Fig. 1).

#### Effect of Age and Sex on Biochemical Values

The results of analyzing age, sex, and sex-age interaction on biochemical values are listed in Table 4. Significant effects by age were shown for TP, ALB, GLOB, A/G, ALT, AST, ALP, GGT, LDH, CK, BUN, CREA, GLU, TG, TCHOL, K, Na, Ca, P, and Mg. Significant effects by sex were shown for ALB, GLOB, A/G, ALP, GGT, LDH, CREA, Cl, Ca, and P. Significant effects by age-sex interaction were shown for ALB, GLOB, A/G, ALT, ALP, GGT, LDH, CREA, TCHOL, K, Na, Ca, P, and Mg. Serum ALP varied with age in both sexes ( $P<0.01$ ) and was significantly higher in females than males ( $P<0.05$ ) in the groups aged 13–24 months and 25–36 months; however, in the three groups aged over 25–36 months, serum ALP was significantly lower in females than males ( $P<0.01$ ) (Fig. 2A). CREA concentration increased with age ( $P<0.01$ ) in all age groups; specifically in the groups aged 49–60 months and 61–72 months, CREA was significantly higher ( $P<0.01$ ) in males than females (Fig. 2B). Total protein and globulin increase with age ( $P<0.01$ , Figs. 2C, 2D).

#### Discussion

In this study, hematological and biochemical analyses of 917 cynomolgus monkeys were performed in order to establish baseline reference indices for the macaque species by age and sex and determine the effects of age and sex on these blood indices. Reference indices are essential to evaluating preclinical findings and selecting healthy subjects. Due to its strong homology with the human, the cynomolgus monkey serves as a valuable animal model; for example, the species already plays an important role in aging disease, virological, reproductive physiological, behavioral, and neurophysiological research.

As previous reports have shown age and sex to be factors affecting hematological and biochemical parameters in non-human primates, it is essential to construct reference indices of blood-based parameters across different age groups by sex. In comparison to prior studies that have constructed reference ranges in cynomolgus monkeys [17,21], most blood indices showed remarkable similarity, while some parameters (e.g., RBC, GLOB, AST and LDH) displayed large inter-study variability in the same age range. This discrepancy may be due, in part, to the differing geographic origins of the monkeys under investigation. In addition, these results provide valuable supplementation to some scantily-studied parameters (e.g., IRF, HFR, MFR, and LFR).

In addition to age and sex, hematological and biochemical parameters of non-human primates can also be affected by other factors, such as species, anaesthetics, fasting, gravidity, etc. Thus, several experimental conditions should be taken into account when comparatively interpreting results from other studies. First, blood sample collection was performed on conscious animals in our study, as conscious collection may better reflect actual physiological values; accordingly, prior reports have demonstrated that anaesthetics can alter serum biochemical and hematological variables. For example, ketamine anesthesia for cynomolgus monkeys produces reductions in the white blood cell count, glucose, and potassium, along with increases in aspartate



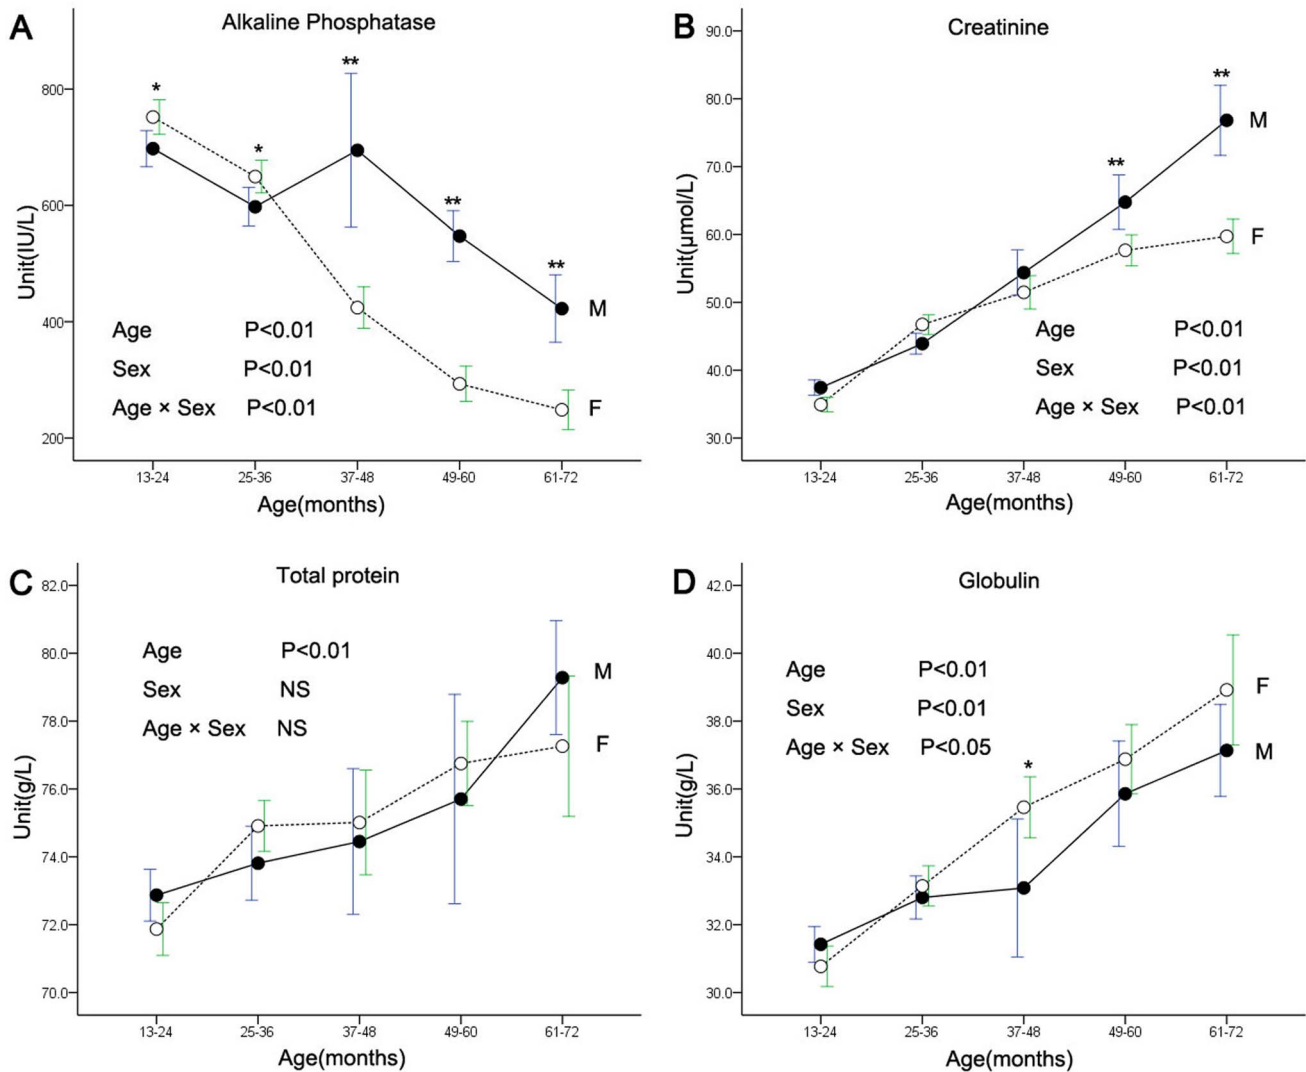

**Figure 2. Changes of alkaline phosphatase (A), creatinine (B), total protein (C) and globulin (D) in males and females with age.** Data are presented as means  $\pm$  SDs at each point. Significant difference between indicated age groups as revealed by *post hoc* analyses (\* $P < 0.05$ , \*\* $P < 0.01$ ). NS, not significant.

doi:10.1371/journal.pone.0064892.g002

aminotransferase and creatine phosphokinase as compared to the conscious state [29]; moreover, similar findings have been reported in rhesus [30] and bonnet monkeys [31]. Second, all subjects in our study were fasting 14–16 hours before blood collection; according to the recommendations of the American Association for Clinical Chemistry's Division of Animal Clinical Chemistry (AACC-DACC) and the American Society for Veterinary Clinical Pathology's (ASVCP) Joint Committee on Clinical Pathology Testing of Laboratory Species, a 12–18 hour overnight fast for animal species prior to blood collection is essential [38,39]. As drug absorption rates are known to be influenced by fed and fasting states [40,41], the rationale of using fasting animals is to reduce variability in analytes (e.g., glucose, triglycerides), which are highly sensitive to fed and fasting states [42]. Moreover, all subjects in this study were housed in social groups to mimic wild conditions, so they were allowed to take food freely. Therefore, food intake was not controlled. As some analytes can vary due to differential consumption, we choose to collect blood after overnight fasting in order to reduce the variability and standardize

analyte concentrations. One prior study [43] has reported on the effects of fasting in cynomolgus monkeys and demonstrated that several indices (e.g. BUN, ALP, AST) do vary between fed and fasting states; however, the health of the animals was not affected. Thus, when comparing results, food intake should be considered. Third, it is necessary to consider inter-species variability when assessing blood-based parameters from other non-human primate species. Chen et al. [27] has established reference values for hematological and biochemical parameters of Chinese rhesus monkeys aged 3–5 years. When contrasted to the parameters of the groups aged 37–48 months and 49–60 months here, GLOB levels of cynomolgus monkeys were 1.45- and 1.51-fold higher than rhesus monkeys, respectively. Moreover, TBIL levels of rhesus monkeys were 1.42- and 1.52-fold higher than cynomolgus monkeys, respectively. However, several parameters displayed similarities between the two species (e.g., ALP, LDH, K, Na, Ca, Mg, and Cl). Therefore, although both monkeys are macaque species, the cynomolgus monkey and rhesus monkey display a high degree of inter-species variability in their blood-based parameters.

Fourth, the animals in this study were non-pregnant, but differences in hematological and biochemical parameters between pregnant and non-pregnant monkeys have been previously reported [32,33,44,45]. If the reference indices presented here are applied to other studies, the experimental conditions should be consistent with those described above; otherwise, the presumed “normal” values may be beyond the normal range.

Age- and sex-related differences were apparent in several hematological and biochemical parameters here. Red blood cell count, hemoglobin, and hematocrit are key clinical diagnostic indices for anemia and internal haemorrhage. Consistent with our findings in the two groups aged over 37–48 months, previous data from various non-human primate species [21,46,47] and humans [48] have demonstrated that females display significantly lower values of RBC, HGB, and HCT than males. This phenomenon may relate to menstruation-related blood loss.

Serum alkaline phosphatase (ALP) is a commonly-used biochemical marker reflecting bone formation and osteoblast activity [49]. This study found that serum ALP declines with age, which may be attributable to skeletal growth velocity. Decreases in ALP concentrations have also been observed in the bonnet monkey, marmoset, and African green monkey [28,50,51]. Interestingly, sex-based differences were also found here. In the 13–24 month and 25–36 month age groups, serum ALP concentrations were higher in females than males; however, the situation was reversed in the 37–72 month age group. This may be related to different development time courses between males and females; specifically, the growth development period of male cynomolgus monkeys is longer than females and usually ends at 5 to 6 years of age. Similar changes in ALP have also been reported in vervet monkeys [46] and humans [52].

Creatinine (CREA) is a low-molecular weight nitrogen compound produced by muscle metabolism, and elevated CREA levels are known to occur with greater muscle mass ratios under normal conditions. In this study, the CREA level was found to be elevated with age and to be significantly higher in males than females in the 49–60 month and 61–72 month age groups, probably on account of the greater muscle mass in these subjects. This observation is consistent with other non-human primate species [25,46,50,53]; however, Annarita et al. [54] reported no significant difference in CREA levels between juveniles and adults. In addition, total protein and globulin showed age-related differences here, which were also found in the rhesus monkey [27], bonnet monkey [50] and chimpanzee [55]. This phenomenon may be related to developmental characteristics.

Considering that all subjects in this study were under 72 months, blood-based reference indices for cynomolgus monkeys older than 72 months of age should be supplemented in future studies with the goal of constructing a more holistic database of reference indices while determining the effects of age and sex across a wider span of age groups.

## Conclusion

In conclusion, the baseline values of hematological and biochemical parameters reported herein establish comprehensive

and accurate reference indices of hematological and biochemical parameters in the cynomolgus monkey by age and sex, thereby providing researchers with improved assessment criteria in selecting healthy subjects and evaluating preclinical studies using this macaque species.

## Supporting Information

### Table S1 Hematological values and ranges of cynomolgus monkeys aged 13–24 months.

(DOC)

### Table S2 Hematological values and ranges of cynomolgus monkeys aged 25–36 months.

(DOC)

### Table S3 Hematological values and ranges of cynomolgus monkeys aged 37–48 months.

(DOC)

### Table S4 Hematological values and ranges of cynomolgus monkeys aged 49–60 months.

(DOC)

### Table S5 Hematological values and ranges of cynomolgus monkeys aged 61–72 months.

(DOC)

### Table S6 Biochemical values and ranges of cynomolgus monkeys aged 13–24 months.

(DOC)

### Table S7 Biochemical values and ranges of cynomolgus monkeys aged 25–36 months.

(DOC)

### Table S8 Biochemical values and ranges of cynomolgus monkeys aged 37–48 months.

(DOC)

### Table S9 Biochemical values and ranges of cynomolgus monkeys aged 49–60 months.

(DOC)

### Table S10 Biochemical values and ranges of cynomolgus monkeys aged 61–72 months.

(DOC)

## Acknowledgments

We thank Xishan Zhongke Laboratory Animals Co. Ltd. (Suzhou, China) for providing the facilities to conduct the study and Dr. N.D. Melgiri for his assistance in editing and proofreading this manuscript. We thank Professor Carol A. Shively for detailed discussion on data statistics.

## Author Contributions

Conceived and designed the experiments: LX PX. Performed the experiments: LX FX SL YJ QZ QW WG LF LZ. Analyzed the data: LX FX LL. Contributed reagents/materials/analysis tools: LX XF SL QZ. Wrote the paper: LX FX KC JL PX.

## References

- Eudey A (2008) “The crab-eating macaque (*Macaca fascicularis*) widespread and rapidly declining.” *Primate conservation* 23: 129–132.
- Eric Van Esch J, Cline M, Buse E, Wood CE, de Rijk EPCT, et al. (2008) Summary comparison of female reproductive system in human and the cynomolgus monkey (*Macaca fascicularis*). *Toxicologic Pathology* 36: 171S–172S.
- Drevon-Gaillot E, Perron-Lepage MF, Clement C, Burnett R (2006) A review of background findings in cynomolgus monkeys (*Macaca fascicularis*) from three different geographical origins. *Exp Toxicol Pathol* 58: 77–88.
- Fa JE (1989) The genus *Macaca*: a review of taxonomy and evolution. *Mammal Rev* 19: 45–81.
- Fortman JD, Hewett TA, Bennet BT (2002) *The Laboratory Nonhuman Primates*. Chicago: CRC Press. Chapter 1: Important biological features.

6. Kimura N, Tanemura K, Nakamura S, Takashima A, Ono F, et al. (2003) Age-related changes of Alzheimer's disease-associated proteins in cynomolgus monkey brains. *Biochem Biophys Res Commun* 310: 303–311.
7. Wu J, Basha MR, Brock B, Cox DP, Cardozo-Pelaez F, et al. (2008) Alzheimer's disease (AD)-like pathology in aged monkeys after infantile exposure to environmental metal lead (Pb): evidence for a developmental origin and environmental link for AD. *J Neurosci* 28: 3–9.
8. Jayo MJ, Jerome CP, Lees CJ, Rankin SE, Weaver DS (1994) Bone mass in female cynomolgus macaques: a cross-sectional and longitudinal study by age. *Calcif Tissue Int* 54: 231–236.
9. Carlson CS, Loeser RF, Purser CB, Gardin JF, Jerome CP (1996) Osteoarthritis in cynomolgus macaques. III: Effects of age, gender, and subchondral bone thickness on the severity of disease. *J Bone Miner Res* 11: 1209–1217.
10. Wolfe-Coote S (2005) *The laboratory primate*. Academic Press. 449–466.
11. Bennett BT, Abec CR, Henrickson R (1995) *Nonhuman Primates in Biomedical Research: Biology and Management*. Academic Press. 377–388.
12. Wolfe-Coote S (2005) *The laboratory primate*. Academic Press. 75–89.
13. Shevtsova ZV, Lapin BA, Doroshenko NV, Krilova LI, Lomovskay IB, et al. (1988) Spontaneous and experimental hepatitis A in Old World monkeys. *J Med Primatol* 17: 177–194.
14. O'Sullivan MG, Anderson DC, Fikes JD, Brain FT, Carlson CS, et al. (1994) Identification of a novel simian parvovirus in cynomolgus monkeys with severe anemia. A paradigm of human B19 parvovirus infection. *J Clin Invest* 93: 1571–1576.
15. MacArthur JA, Mann PG, Oreffo V, Scott GB (1979) Measles in monkeys: an epidemiological study. *J Hyg (Lond)* 83: 207–212.
16. Shchelkunov SN, Totmenin AV, Babkin IV, Safronov PF, Ryazankina OI, et al. (2001) Human monkeypox and smallpox viruses: genomic comparison. *FEBS Lett* 509: 66–70.
17. Schuurman HJ, Smith HT (2005) Reference values for clinical chemistry and clinical hematology parameters in cynomolgus monkeys. *Xenotransplantation* 12: 72–75.
18. Bonfanti U, Lamparelli D, Colombo P, Bernardi C (2009) Hematology and serum chemistry parameters in juvenile cynomolgus monkeys (*Macaca fascicularis*) of Mauritius origin: comparison between purpose-bred and captured animals. *J Med Primatol* 38: 228–235.
19. Koga T, Kanefuji K, Nakama K (2005) Individual reference intervals of hematological and serum biochemical parameters in cynomolgus monkeys. *Int J Toxicol* 24: 377–385.
20. Perretta G, Violante A, Scarpulla M, Beciani M, Monaco V (1991) Normal serum biochemical and hematological parameters in *Macaca fascicularis*. *J Med Primatol* 20: 345–351.
21. Sugimoto Y, Hanari K, Narita H, Honjo S (1986) Normal hematologic values in the cynomolgus monkeys aged from 1 to 18 years. *Jikken Dobutsu* 35: 443–447.
22. Smucny DA, Allison DB, Ingram DK, Roth GS, Kemnitz JW, et al. (2001) Changes in blood chemistry and hematology variables during aging in captive rhesus macaques (*Macaca mulatta*). *J Med Primatol* 30: 161–173.
23. Yoshida T, Suzuki K, Cho F, Honjo S (1986) [Age-related changes in hematological and serum biochemical values in cynomolgus monkeys (*Macaca fascicularis*) bred and reared using the indoor individually-caged system]. *Jikken Dobutsu* 35: 329–338.
24. Ihrig M, Tassinari LG, Bernacki B, Keeling ME (2001) Hematologic and serum biochemical reference intervals for the chimpanzee (*Pan troglodytes*) categorized by age and sex. *Comp Med* 51: 30–37.
25. Harewood WJ, Gillin A, Hennessy A, Armistead J, Horvath JS, et al. (1999) Biochemistry and haematology values for the baboon (*Papio hamadryas*): the effects of sex, growth, development and age. *J Med Primatol* 28: 19–31.
26. Chen Y, Ono F, Yoshida T, Yoshikawa Y (2002) Relationship between body weight and hematological and serum biochemical parameters in female cynomolgus monkeys (*Macaca fascicularis*). *Exp Anim* 51: 125–131.
27. Chen Y, Qin S, Ding Y, Wei L, Zhang J, et al. (2009) Reference values of clinical chemistry and hematology parameters in rhesus monkeys (*Macaca mulatta*). *Xenotransplantation* 16: 496–501.
28. Liddie S, Goody RJ, Valles R, Lawrence MS (2010) Clinical chemistry and hematology values in a Caribbean population of African green monkeys. *J Med Primatol* 39: 389–398.
29. Kim CY, Lee HS, Han SC, Heo JD, Kwon MS, et al. (2005) Hematological and serum biochemical values in cynomolgus monkeys anesthetized with ketamine hydrochloride. *J Med Primatol* 34: 96–100.
30. Lugo-Roman LA, Rico PJ, Sturdivant R, Burks R, Settle TL (2010) Effects of serial anesthesia using ketamine or ketamine/medetomidine on hematology and serum biochemistry values in rhesus macaques (*Macaca mulatta*). *J Med Primatol* 39: 41–49.
31. Venkatesan R, Nagarajan P, Rajaretnam RS, Majumdar SS (2006) Hematologic and serum biochemical values in aged female bonnet macaques (*Macaca radiata*) anesthetized with ketamine hydrochloride. *J Am Assoc Lab Anim Sci* 45: 45–48.
32. Suzuki T, Suzuki N, Shimoda K, Nagasawa H (1996) Hematological and serum biochemical values in pregnant and postpartum females of the squirrel monkey (*Saimiri sciureus*). *Exp Anim* 45: 39–43.
33. Fujiwara T, Suzaki Y, Yoshioka Y, Honjo S (1974) Hematological changes during pregnancy and postpartum period in cynomolgus monkeys (*Macaca fascicularis*). *Jikken Dobutsu* 23: 137–146.
34. MacKenzie M, Lowenstine L, Lalchandani R, Lerche N, Osborn K, et al. (1986) Hematologic abnormalities in simian acquired immune deficiency syndrome. *Lab Anim Sci* 36: 14–19.
35. Sammons LS, Kenyon RH, Burger GT, Pedersen CE Jr, Spertzel RO (1976) Changes in blood serum constituents and hematologic values in *Macaca mulatta* with Rocky Mountain spotted fever. *Am J Vet Res* 37: 725–730.
36. Xu F, Xie L, Li X, Li Q, Wang T, et al. (2012) Construction and validation of a systematic ethogram of *Macaca fascicularis* in a free enclosure. *PLOS ONE* 7: e37486.
37. Institute for Laboratory Animal Research (1996) *Guide for the care and use of laboratory animals*. Washington (DC): National Academies Press.
38. Organization for Economic Cooperation and Development (OECD). (1995) *Guideline for Testing of Chemicals, Section 4, Health Effects*. OECD Guideline No. 407–409.
39. Weingand K, Bloom J, Carakostas M, Hall R, Helfrich M, et al. (1992) Clinical pathology testing recommendations for nonclinical toxicity and safety studies. AACC-DACC/ASVCP Joint Task Force. *Toxicol Pathol* 20: 539–543.
40. Doluisio JT, Tan GH, Billups NF, Diamond L (1969) Drug absorption. II. Effect of fasting on intestinal drug absorption. *J Pharm Sci* 58: 1200–1202.
41. Orr JM, Benet LZ (1975) The effect of fasting on the rate of intestinal drug absorption in rats: preliminary studies. *Am J Dig Dis* 20: 858–865.
42. Warnick GR, Nakajima K (2008) Fasting versus nonfasting triglycerides: implications for laboratory measurements. *Clin Chem* 54: 14–16.
43. Zeng XC, Yang CM, Pan XY, Yao YS, Pan W, et al. (2011) Effects of fasting on hematologic and clinical chemical values in cynomolgus monkeys (*Macaca fascicularis*). *J Med Primatol* 40: 21–26.
44. Buchl SJ, Howard B (1997) Hematologic and serum biochemical and electrolyte values in clinically normal domestically bred rhesus monkeys (*Macaca mulatta*) according to age, sex, and gravidity. *Lab Anim Sci* 47: 528–533.
45. Switzer JW, Valerio DA, Martin DP, Valerio MG, Rininger BF (1970) Hematologic changes associated with pregnancy and parturition in *Macaca mulatta*. *Lab Anim Care* 20: 930–939.
46. Sato A, Fairbanks LA, Lawson T, Lawson GW (2005) Effects of age and sex on hematologic and serum biochemical values of vervet monkeys (*Chlorocebus aethiops sabaeus*). *Contemp Top Lab Anim Sci* 44: 29–34.
47. Riviello MC, Wirz A (2001) Haematology and blood chemistry of *Cebus apella* in relation to sex and age. *J Med Primatol* 30: 308–312.
48. Castro OL, Haddy TB, Rana SR (1987) Age- and sex-related blood cell values in healthy black Americans. *Public Health Rep* 102: 232–237.
49. Delmas PD (1995) Biochemical markers for the assessment of bone turnover. In: Riggs BL, Melton LJ, editors. *Osteoporosis: etiology, diagnosis, and management*. 2nd ed. Philadelphia: Lippincott-Raven. 319–333.
50. Pierre PJ, Sequeira MK, Corcoran CA, Blevins MW, Gee M, et al. (2011) Hematological and serum biochemical indices in healthy bonnet macaques (*Macaca radiata*). *J Med Primatol* 40: 287–293.
51. Davy CW, Jackson MR, Walker J (1984) Reference intervals for some clinical chemical parameters in the marmoset (*Callithrix jacchus*): effect of age and sex. *Lab Anim* 18: 135–142.
52. Krabbe S, Christiansen C, Rodbro P, Transbol I (1980) Pubertal growth as reflected by simultaneous changes in bone mineral content and serum alkaline phosphatase. *Acta Paediatr Scand* 69: 49–52.
53. Fernie S, Wrenshall E, Malcolm S, Bryce F, Arnold DL (1994) Normative hematologic and serum biochemical values for adult and infant rhesus monkeys (*Macaca mulatta*) in a controlled laboratory environment. *J Toxicol Environ Health* 42: 53–72.
54. Wirz A, Truppa V, Riviello MC (2008) Hematological and plasma biochemical values for captive tufted capuchin monkeys (*Cebus apella*). *Am J Primatol* 70: 463–472.
55. Herndon JG, Tigges J (2001) Hematologic and blood biochemical variables of captive chimpanzees: cross-sectional and longitudinal analyses. *Comp Med* 51: 60–69.
